# Supplementary material for: Absorption behavior of poly(methyl methacrylate)–multiwalled carbon nanotube composites: effects of UV irradiation
Source: Royal Society of Chemistry journal article supplement (doi:10.1039/c6cp08738h), 2017-01-01
Supplement: c6cp08738h1.pdf [file c6cp08738h1.pdf]

Absorption behavior of poly(methyl methacrylate)-multiwalled carbon nanotubes composites:  
effects of UV irradiation and multiwalled carbon nanotubes

Je-Chuan Hsu <sup>1)</sup>, Wenxin Cao <sup>2)</sup>, Fuqian Yang <sup>2)</sup>, and Sanboh Lee <sup>1)</sup>

1) Department of Materials Science and Engineering  
National Tsing Hua University, Hsinchu 300, Taiwan

2) Department of Chemical and Materials Engineering  
University of Kentucky, Lexington, KY 40506

Supplementary Information:

Figure S1. Methanol transport in PMMA and PMMA-WMCNT composites at 50°C

Figure S2. Methanol transport in PMMA and PMMA-WMCNT composites at 45°C

Figure S3. Methanol transport in PMMA and PMMA-WMCNT composites at 40°C

Figure S4. Methanol transport in PMMA and PMMA-WMCNT composites at 35°C

Figure S5. Methanol transport in PMMA and PMMA-WMCNT composites at 30°C

Figure S6. Methanol transport in PMMA and PMMA-WMCNT composites irradiated with UV doses of 0, 291.87 and 583.74 J/cm<sup>2</sup> at 50°C

Figure S7. Methanol transport in PMMA and PMMA-WMCNT composites irradiated with UV doses of 0, 291.87 and 583.74 J/cm<sup>2</sup> at 45°C

Figure S8. Methanol transport in PMMA and PMMA-WMCNT composites irradiated with UV doses of 0, 291.87 and 583.74 J/cm<sup>2</sup> at 40°C

Figure S9. Methanol transport in PMMA and PMMA-WMCNT composites irradiated with UV doses of 0, 291.87 and 583.74 J/cm<sup>2</sup> at 35°C

Figure S10. Methanol transport in PMMA and PMMA-WMCNT composites irradiated with UV doses of 0, 291.87 and 583.74 J/cm<sup>2</sup> at 30°C

Figure S11. Temperature dependence of ESR for the diffusion of methanol in the PMMA-MWCNT plates with UV irradiation for the weight percentage of, (a) 0% MWCNTs, (b) 0.1% MWCNTs, and (c) 0.4% MWCNTs

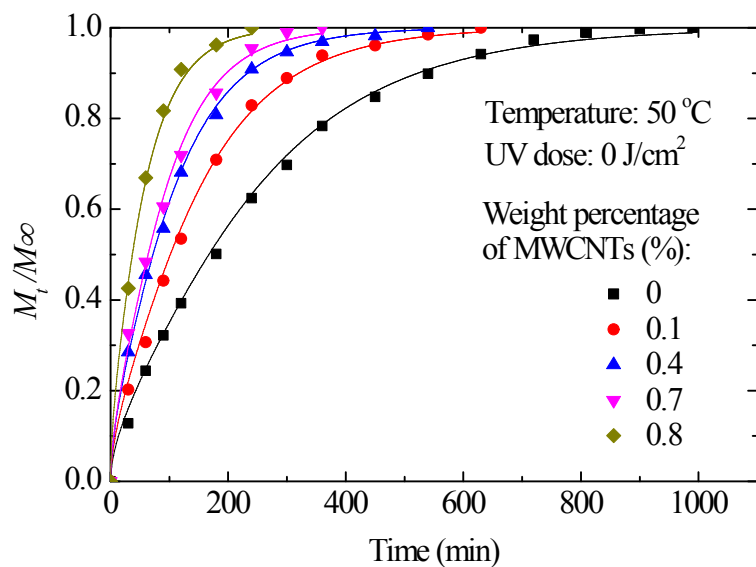

Figure S1. Methanol transport in PMMA and PMMA-WMCNT composites at 50°C

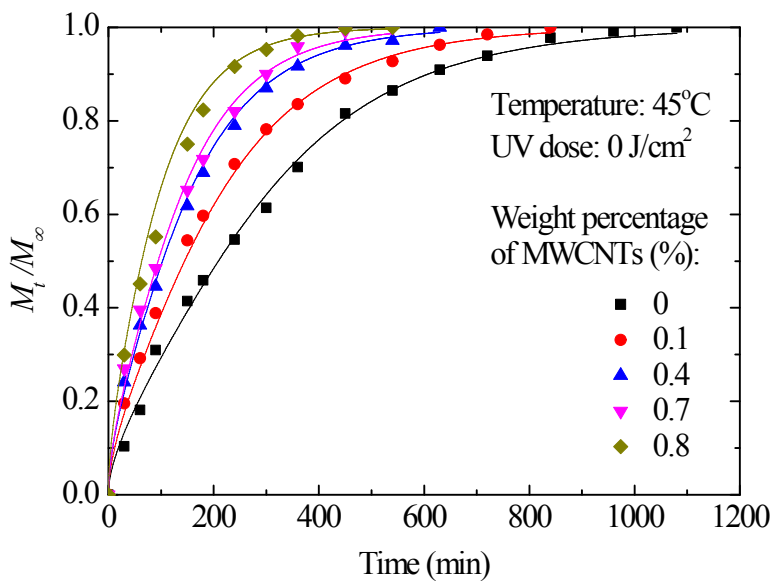

Figure S2. Methanol transport in PMMA and PMMA-WMCNT composites at 45°C

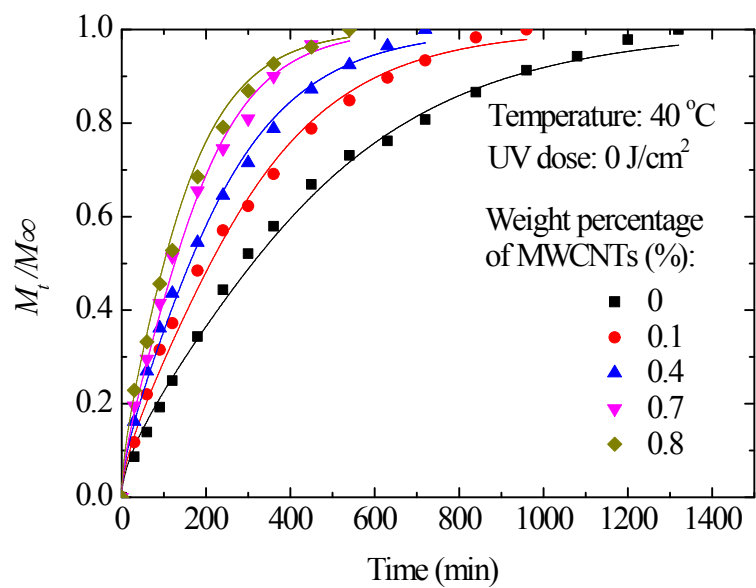

Figure S3. Methanol transport in PMMA and PMMA-WMCNT composites at 40°C

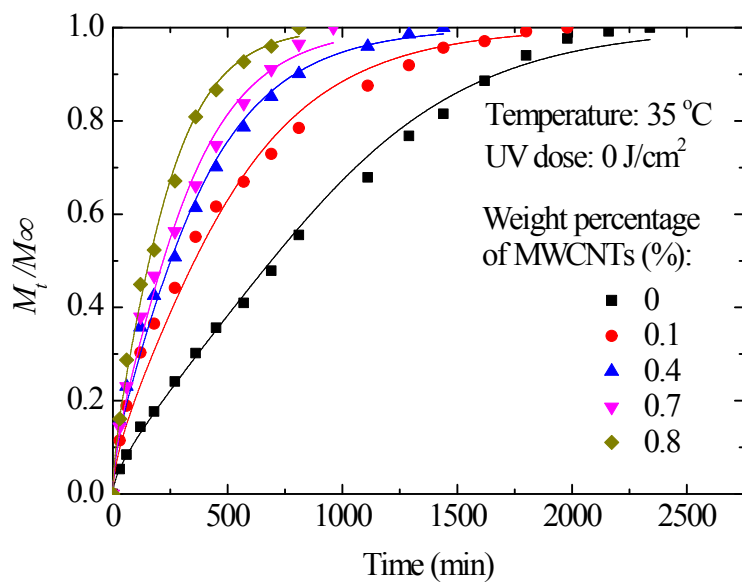

Figure S4. Methanol transport in PMMA and PMMA-WMCNT composites at 35°C

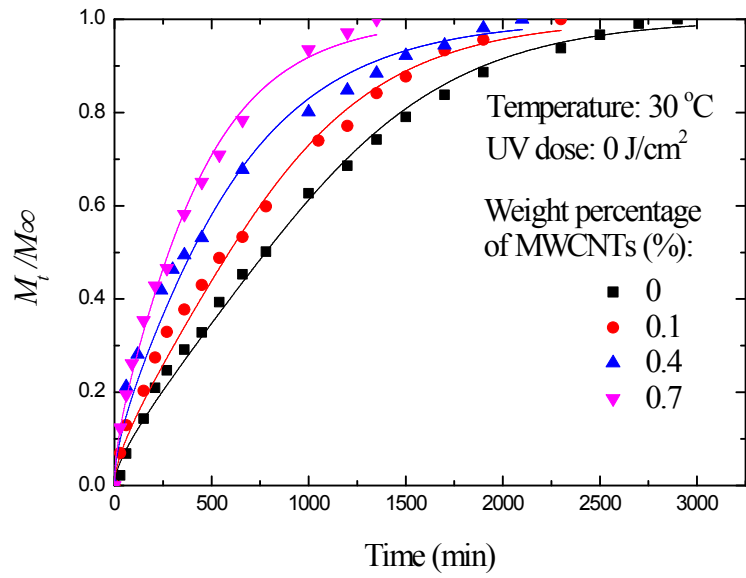

Figure S5. Methanol transport in PMMA and PMMA-WMCNT composites at 30°C

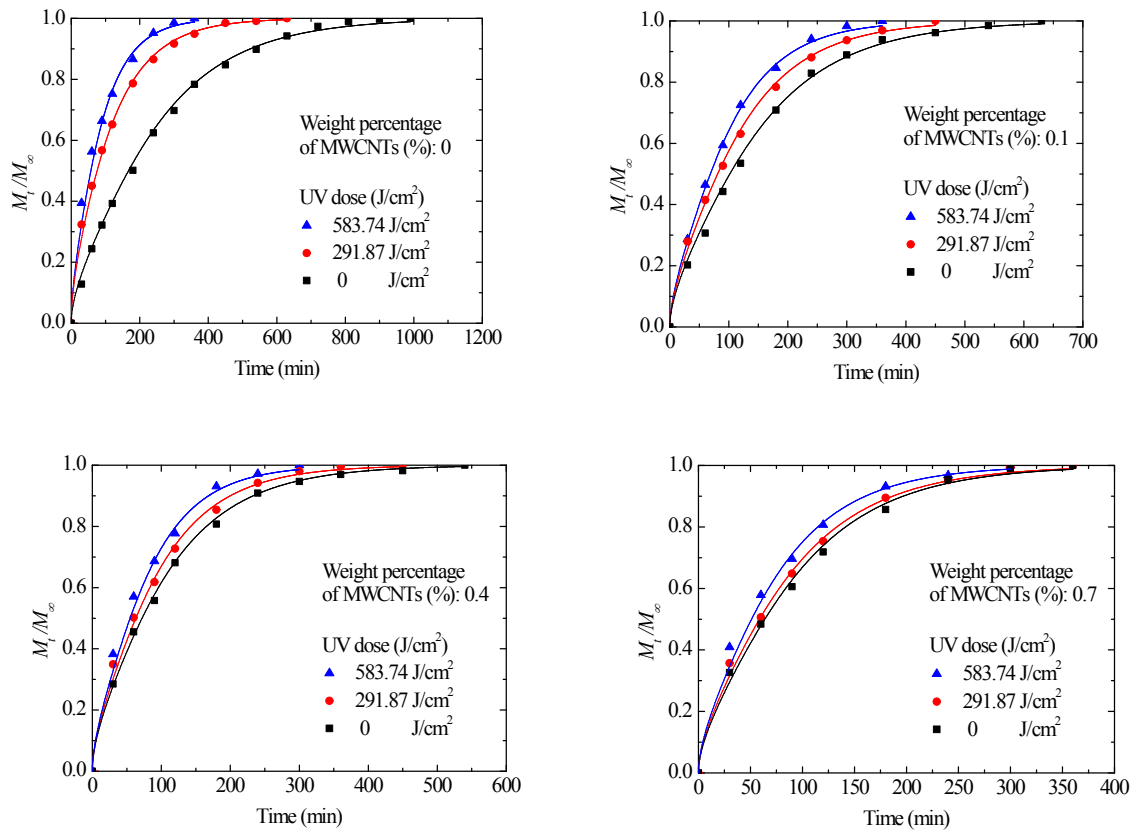

Figure S6. Methanol transport in PMMA and PMMA-WMCNT composites irradiated with UV doses of 0, 291.87 and 583.74 J/cm<sup>2</sup> at 50°C

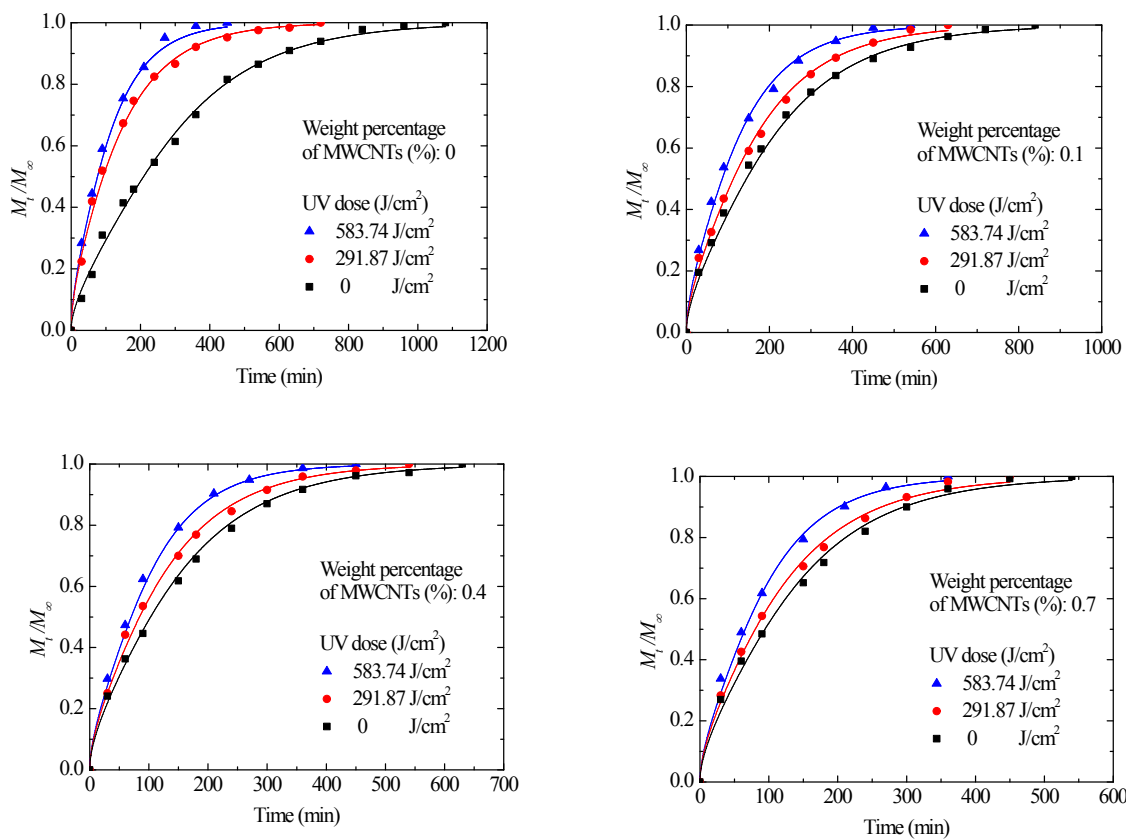

Figure S7. Methanol transport in PMMA and PMMA-WMCNT composites irradiated with UV doses of 0, 291.87 and 583.74 J/cm<sup>2</sup> at 45°C

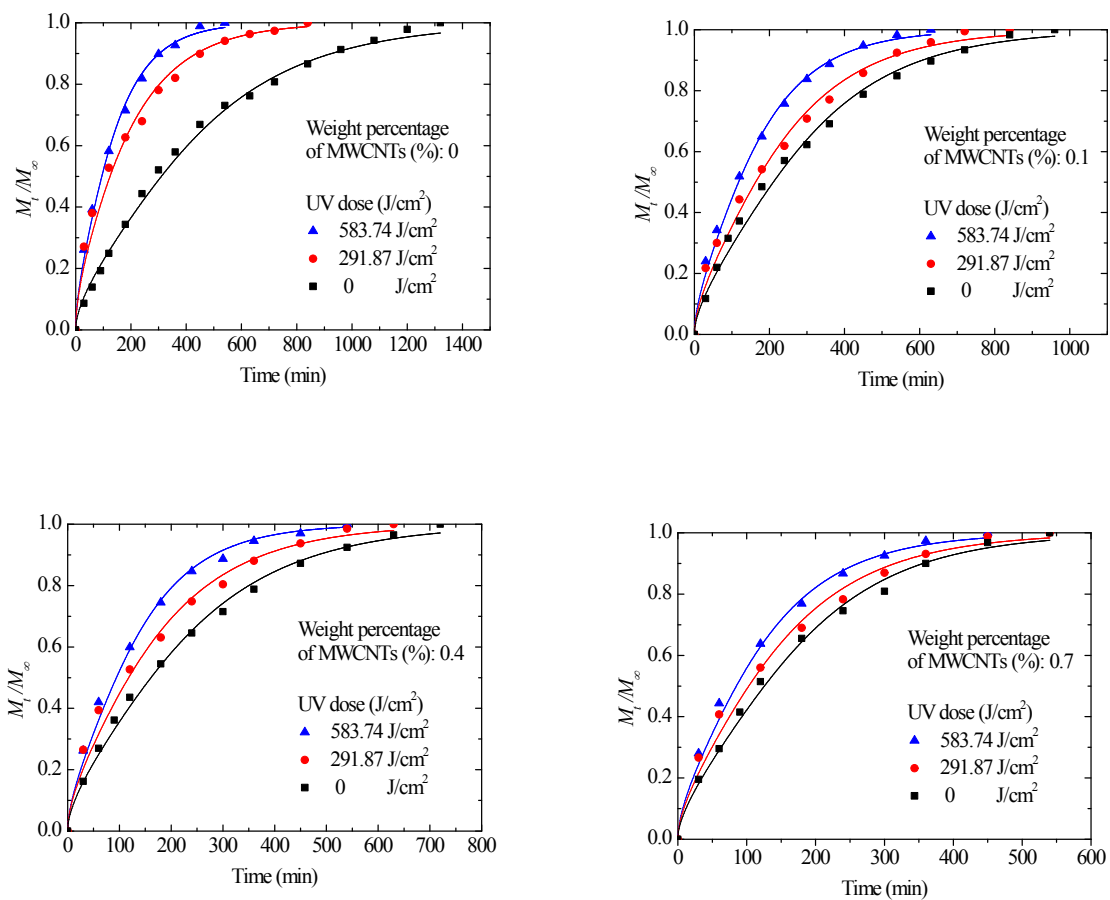

Figure S8. Methanol transport in PMMA and PMMA-WMCNT composites irradiated with UV doses of 0, 291.87 and 583.74  $J/cm^2$  at 40°C

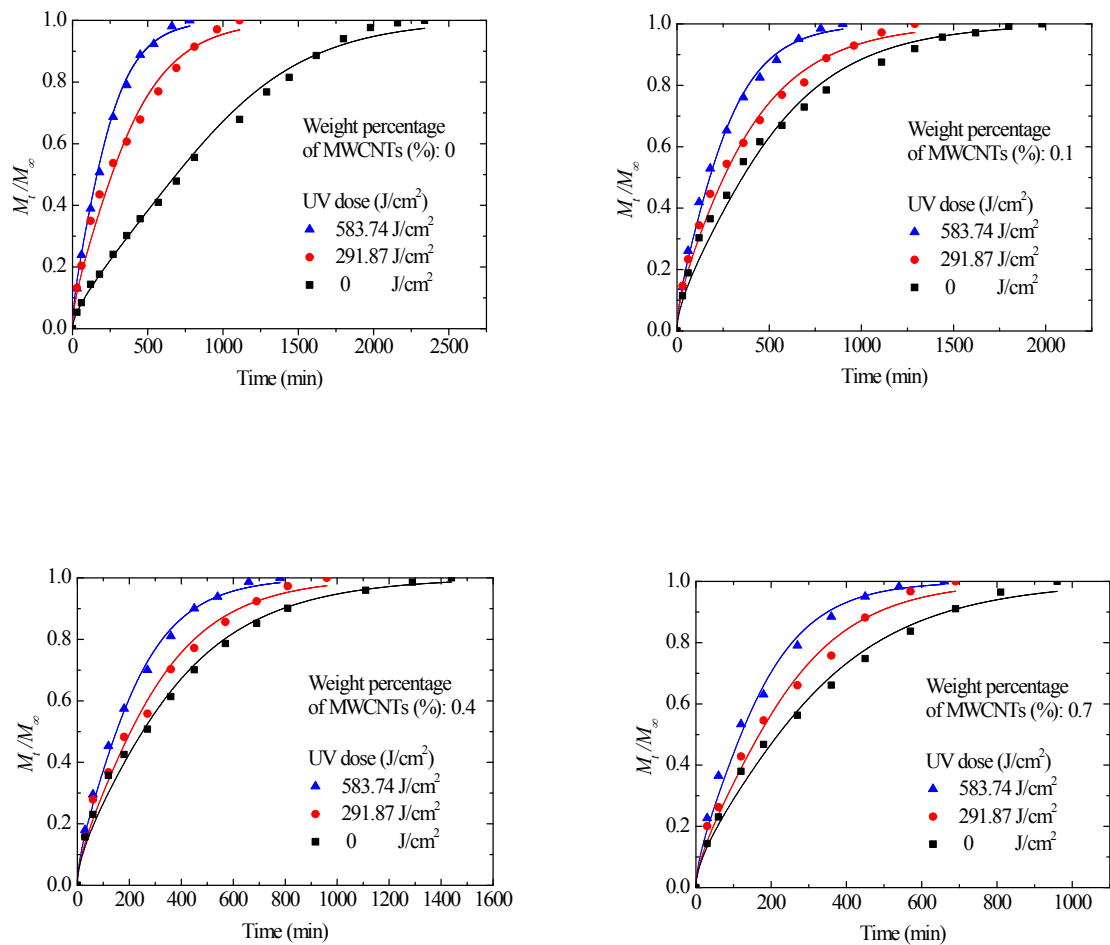

Figure S9. Methanol transport in PMMA and PMMA-WMCNT composites irradiated with UV doses of 0, 291.87 and 583.74 J/cm<sup>2</sup> at 35°C

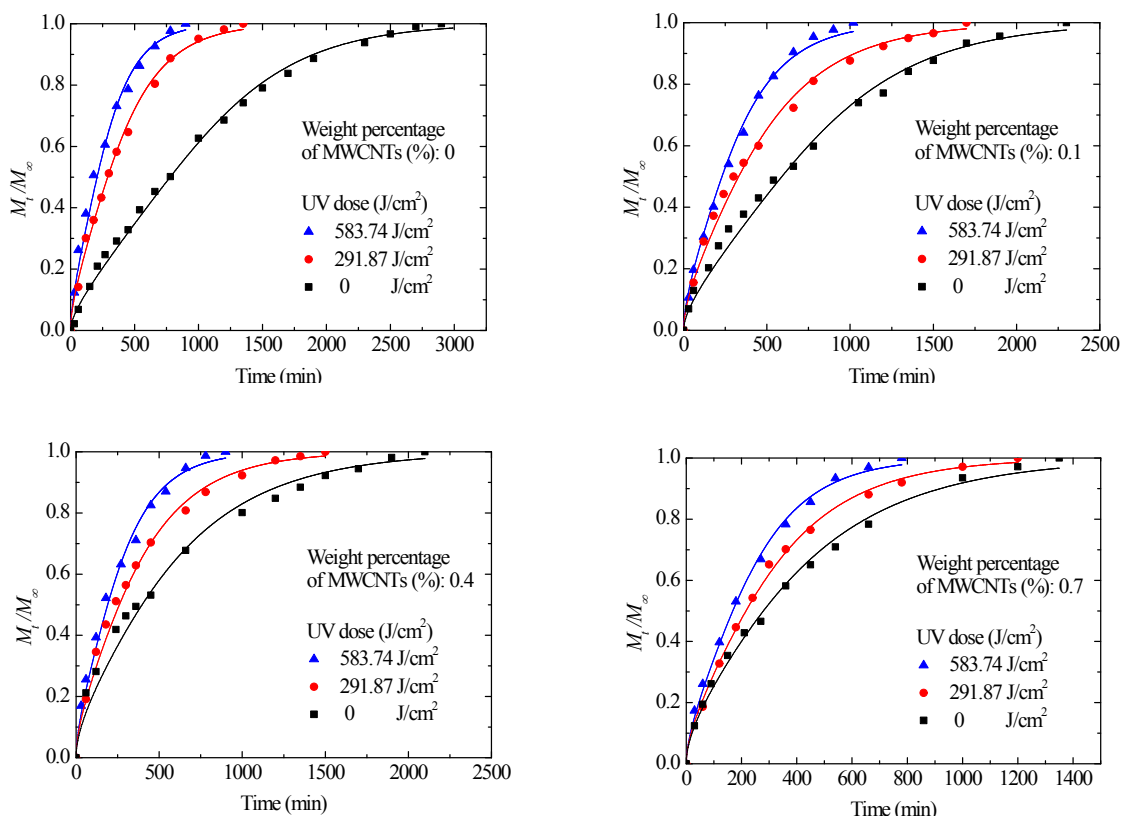

Figure S10. Methanol transport in PMMA and PMMA-WCNT composites irradiated with UV doses of 0, 291.87 and 583.74 J/cm<sup>2</sup> at 30°C

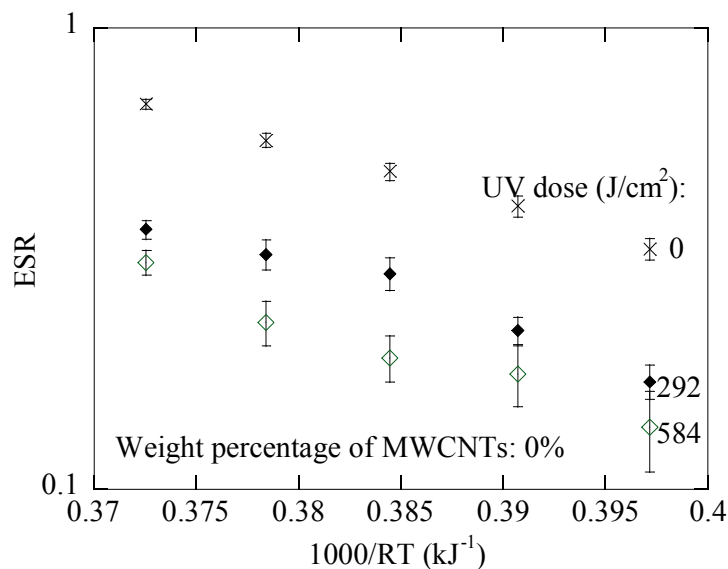

(a)



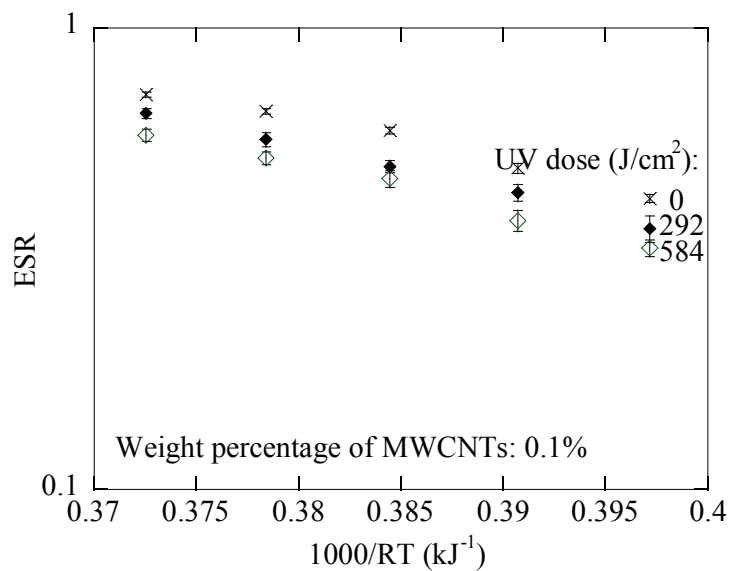

(b)

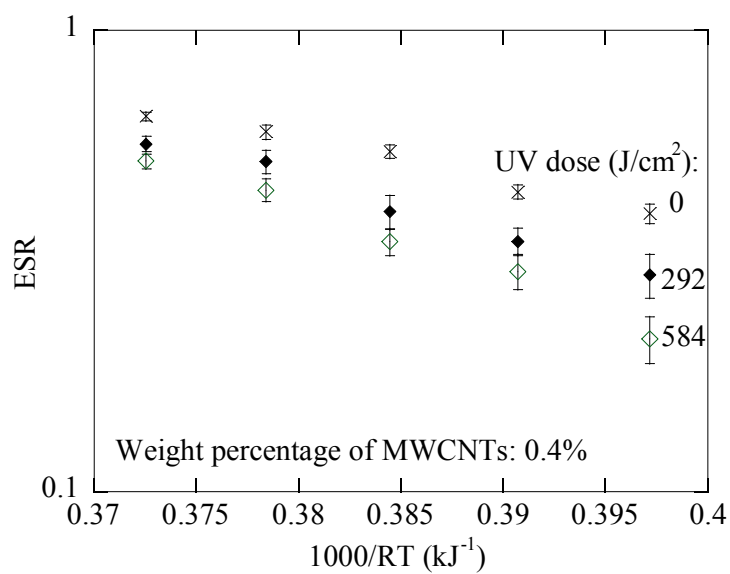

(c)

Figure S11. Temperature dependence of ESR for the diffusion of methanol in the PMMA-MWCNT plates with UV irradiation for the weight percentage of, (a) 0% MWCNTs, (b) 0.1% MWCNTs, and (c) 0.4% MWCNTs
